# Supplementary material for: Identification and characterization of a novel adenomatous polyposis coli mutation in adult pancreatoblastoma
Source: PubMed Central journal article supplement (PMC5828192; doi:10.18632/oncotarget.24017), 2018-01-06
Supplement: oncotarget-09-10818-s001.pdf [file oncotarget-09-10818-s001.pdf]

## Identification and characterization of a novel *adenomatous polyposis coli* mutation in adult pancreatoblastoma

### SUPPLEMENTARY MATERIALS

**Supplementary Table 1: 409 genes list detected in the OncoDEEP® Clinical.** See Supplementary\_Table\_1

**Supplementary Table 2: Antibody used for immunohistochemical staining and immunofluorescence**

| Antibody  | Clone        | Dilution | Pretreatment | Source                 |
|-----------|--------------|----------|--------------|------------------------|
| β-catenin | β-catenin-1  | 1:200    | CB           | DAKO/Agilent, CA, USA  |
| β-catenin | 14/β-catenin | 1:100    |              | BD Biosciences CA, USA |
| Bcl-10    | sc-5273      | 1:400    | CB           | Santa Cruz, CA, USA    |
| APC       | GTX116009    | 1:200    | CB           | GeneTex CA, USA        |
| APC       | ab15270      | 1:500    |              | abcam Cambs. UK        |
| Vinculin  | Ab73412      | 1:500    |              | abcam Cambs. UK        |

CB; Citrate buffer (PH6.0).
